# Supplementary material for: Zirconia-reinforced glass ionomer restorations in molar incisor hypomineralization: a randomized controlled clinical trial
Source: Springer Nature journal article supplement (doi:10.1007/s00784-025-06352-y), 2025-05-08
Supplement: MOESM1 [file 784_2025_6352_MOESM1_ESM.pdf]

## *Supplementary Information*

### **Clinical Oral Investigations**

#### **Zirconia-reinforced glass ionomer restorations in molar incisor hypomineralization: a randomized controlled clinical trial**

Reham A. Mahfouz<sup>1</sup>, Azza G. Hanno<sup>2</sup>, Amina M. Abd El Rahman<sup>2</sup>

<sup>1</sup> PhD candidate, Department of Pediatric Dentistry, Faculty of Dentistry, Alexandria University, El Khartoum Square, Alexandria 21131, Egypt

<sup>2</sup> Professor, Department of Pediatric Dentistry, Faculty of Dentistry, Alexandria University, El Khartoum Square, Alexandria 21131, Egypt

Corresponding author: Reham A. Mahfouz

[reham.mahfouz@alexu.edu.eg](mailto:reham.mahfouz@alexu.edu.eg)

Orchid iD: 0009-0004-2506-671

**Table S1-** MIH Treatment Need Index[1]

| Index   | Definition                                                                                  |
|---------|---------------------------------------------------------------------------------------------|
| Index 0 | No MIH, clinically free of MIH                                                              |
| Index 1 | MIH without hypersensitivity, without defect                                                |
| Index 2 | MIH without hypersensitivity, with defect                                                   |
| 2a      | <1/3 defect extension                                                                       |
| 2b      | >1/3 < 2/3 defect extension                                                                 |
| 2c      | >2/3 defect extension or/and defect close to the pulp or extraction or atypical restoration |
| Index 3 | MIH with hypersensitivity, without defect                                                   |
| Index 4 | MIH with hypersensitivity, with defect                                                      |
| 4a      | <1/3 defect extension                                                                       |
| 4b      | >1/3 < 2/3 defect extension                                                                 |
| 4c      | >2/3 defect extension or/and defect close to the pulp or extraction or atypical restoration |

**Table S2** ART Evaluation Criteria [2]

| Code | Criterion                                                                            | Definition |
|------|--------------------------------------------------------------------------------------|------------|
| 0    | Present, satisfactory                                                                | Successful |
| 1    | Present, slight defect at the cavity margin of less than 0.5 mm; no repair is needed | Successful |
| 2    | Present, marginal defect deeper than 0.5 mm                                          | Failed     |
| 3    | Partially present, restoration and/or tooth breakdown                                | Failed     |
| 4    | Not present, restoration missing                                                     | Failed     |
| 5    | Not present, other restorative treatment has been performed                          | Failed     |
| 6    | Not present, tooth has been extracted                                                | Failed     |
| 7    | Pulpal involvement                                                                   | Failed     |
| C    | Caries present                                                                       | Failed     |

**Table S3** Demographic data of the study groups

| Variables     |               | ZrGI (Test)<br>(n=44) | GhGI (Control)<br>(n=44) | <i>p-value</i> |
|---------------|---------------|-----------------------|--------------------------|----------------|
| Age in years  | Mean $\pm$ SD | 7.88 $\pm$ 0.73       | 7.85 $\pm$ 1.00          | 0.904          |
| Gender: n (%) | Males         | 16 (36.4%)            | 24 (54.5%)               | 0.087          |
|               | Females       | 28 (63.6%)            | 20 (45.5%)               |                |
| Arch: n (%)   | Lower         | 24 (54.5%)            | 24 (54.5%)               | 1.00           |
|               | Upper         | 20 (45.5%)            | 20 (45.5%)               |                |

**Table S4** Pairwise comparisons showing pain scores within the ZrGI and GhGI groups

| Groups   | Compared to | <i>p-value</i> |          |
|----------|-------------|----------------|----------|
|          |             | ZrGI           | GhGI     |
| Baseline | 1 Week      | <0.0001*       | <0.0001* |
|          | 3 Months    | <0.0001*       | <0.0001* |
|          | 6 Months    | <0.0001*       | <0.0001* |
|          | 9 Months    | <0.0001*       | <0.0001* |
|          | 12 Months   | <0.0001*       | 0.001*   |
| 1 Week   | 3 Months    | 1.00           | 1.00     |
|          | 6 Months    | 1.00           | 1.00     |
|          | 9 Months    | 1.00           | 1.00     |
|          | 12 Months   | 1.00           | 1.00     |
| 3 Months | 6 Months    | 1.00           | 1.00     |
|          | 9 Months    | 1.00           | 1.00     |
|          | 12 Months   | 1.00           | 1.00     |
| 6 Months | 9 Months    | 1.00           | 1.00     |
|          | 12 Months   | 1.00           | 1.00     |
| 9 Months | 12 Months   | 1.00           | 1.00     |

\*Statistically significant difference at  $p$ -value<0.05

**Table S5** Pairwise comparisons showing sensitivity scores within the ZrGI and GhGI groups

| Groups   | Compared to | <i>p-value</i> |          |
|----------|-------------|----------------|----------|
|          |             | ZrGI           | ZrGI     |
| Baseline | 1 Week      | <0.0001*       | <0.0001* |
|          | 3 Months    | <0.0001*       | <0.0001* |
|          | 6 Months    | 0.008*         | <0.0001* |
|          | 9 Months    | 0.366          | 0.001*   |
|          | 12 Months   | 0.604          | 0.026*   |
| 1 Week   | 3 Months    | 1.00           | 1.00     |
|          | 6 Months    | 1.00           | 1.00     |
|          | 9 Months    | 0.844          | 1.00     |
|          | 12 Months   | 0.525          | 0.489    |
| 3 Months | 6 Months    | 1.00           | 1.00     |
|          | 9 Months    | 0.251          | 1.00     |
|          | 12 Months   | 0.143          | 0.604    |
| 6 Months | 9 Months    | 1.00           | 1.00     |
|          | 12 Months   | 1.00           | 1.00     |
| 9 Months | 12 Months   | 1.00           | 1.00     |

\*Statistically significant difference at  $p$ -value<0.05

**S1.1**

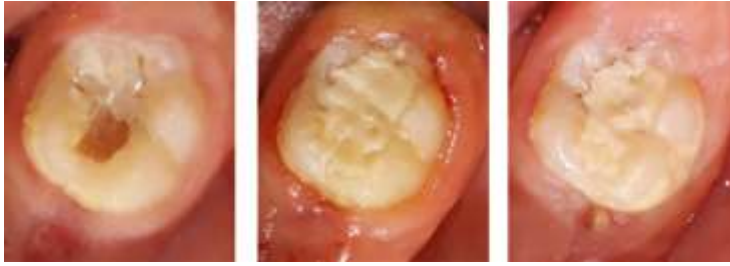

**S1.2**

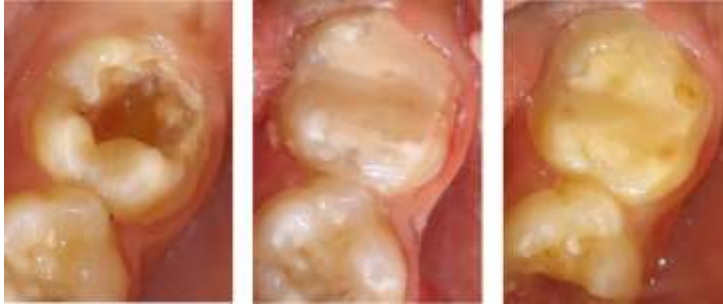

**Figures S1.1 and S1.2** Hypomineralized permanent first molars restored with ZrGI preoperative, postoperative, and after 12 months

**S2.1**

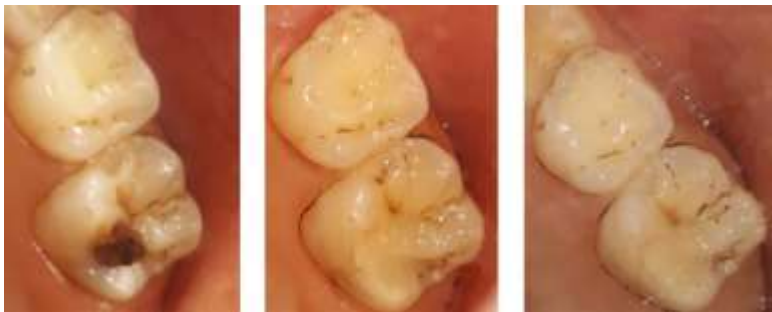

**S2.2**

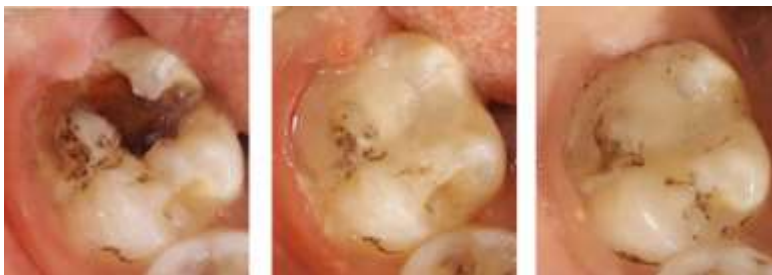

**Figures S2.1 and S2.2** Hypomineralized permanent first molars restored with GhGI preoperative, postoperative and after 12 months

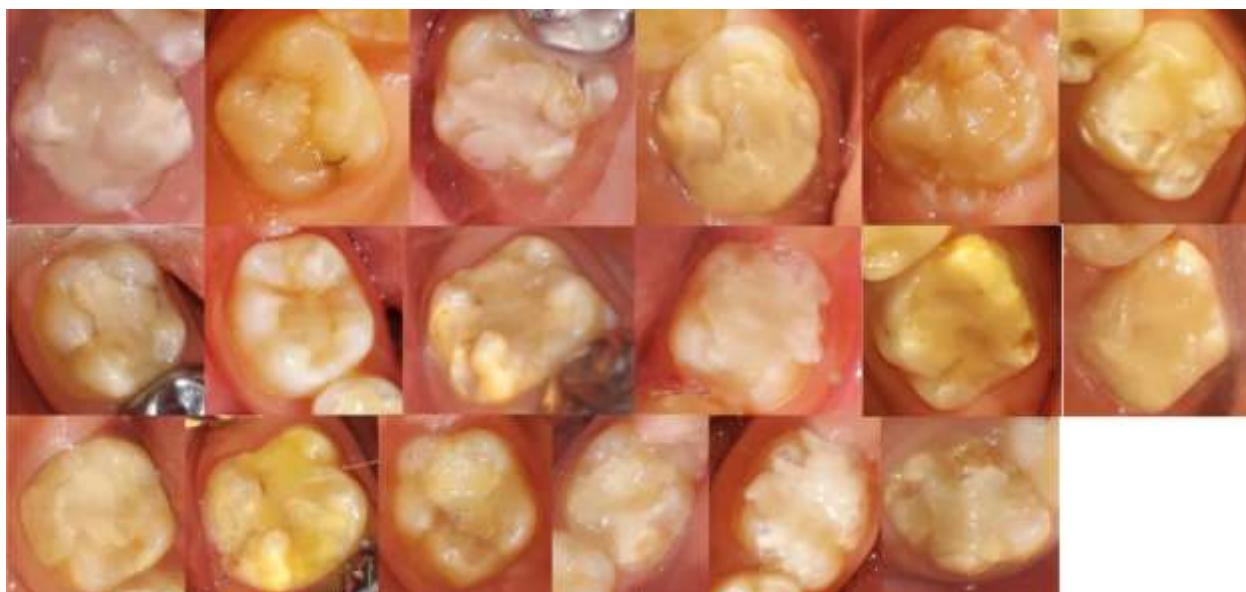

**Figure S3** Hypomineralized molars restored with ZrGI after the 12M follow-up period

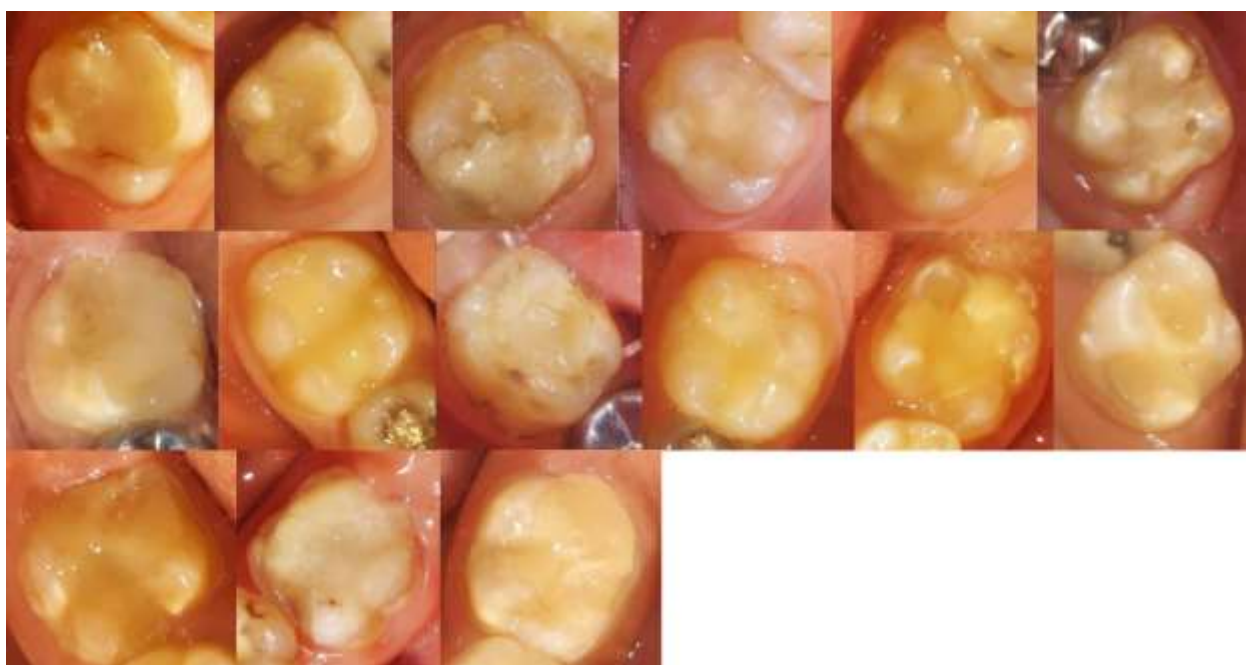

**Figure S4** Hypomineralized molars restored with GhGI after the 12M follow-up period

**Table S6** ART success/failure rates in the ZrGI and GhGI groups

| Time Intervals        | ZrGI (Test)<br>(n=44) |                  | GhGI (Control)<br>(n=44) |                  | <i>p-value</i>     |
|-----------------------|-----------------------|------------------|--------------------------|------------------|--------------------|
|                       | Success<br>n (%)      | Failure<br>n (%) | Success<br>n (%)         | Failure<br>n (%) |                    |
| 3 Months              | 43 (97.7%)            | 1 (2.3%)         | 42 (95.5%)               | 2 (4.5%)         | 1.00 <sup>‡</sup>  |
| 6 Months              | 41 (93.2%)            | 3 (6.8%)         | 41 (93.2%)               | 3 (6.8%)         | 1.00 <sup>‡</sup>  |
| 9 Months              | 39 (88.6%)            | 5 (11.4%)        | 39 (88.6%)               | 5 (11.4%)        | 1.00 <sup>‡</sup>  |
| 12 Months             | 38 (86.4%)            | 6 (13.6%)        | 37 (84.1%)               | 7 (15.9%)        | 0.765 <sup>¥</sup> |
| <b><i>p-value</i></b> | 0.015*                |                  | 0.015*                   |                  |                    |

‡Fisher's Exact test, ¥Pearson Chi Square test

**Table S7** Pairwise comparisons regarding ART scores within ZrGI and GhGI groups

| Groups   | Compared to | <i>p-value</i> |        |
|----------|-------------|----------------|--------|
|          |             | ZrGI           | GhGI   |
| 3 Months | 6 Months    | 1.00           | 1.00   |
|          | 9 Months    | 0.105          | 0.448  |
|          | 12 Months   | 0.018*         | 0.018* |
| 6 Months | 9 Months    | 1.00           | 1.00   |
|          | 12 Months   | 0.448          | 0.105  |
| 9 Months | 12 Months   | 1.00           | 1.00   |

\*Statistically significant difference at  $p\text{-value} < 0.05$

## REFERENCES

1. Steffen R, Krämer N, Bekes K (2017) The Würzburg MIH concept: the MIH treatment need index (MIH TNI) A new index to assess and plan treatment in patients with molar incisor hypomineralisation (MIH). European Archives of Paediatric Dentistry 18:355-361
2. Zanata RL, Fagundes TC, Freitas MC, Lauris JR, Navarro MF (2011) Ten-year survival of ART restorations in permanent posterior teeth. Clin Oral Investig 15:265-71
